# Supplementary material for: In Silico Identification of Sugarcane Genome-Encoded MicroRNAs Targeting Sugarcane Mosaic Virus
Source: MDPI journal article supplement (doi:10.3390/microbiolres15010019), 2024-02-16
Supplement: s1 [file s1]

```
=====
miranda v3.3a      microRNA Target Scanning Algorithm
=====
(c) 2003 Memorial Sloan-Kettering Cancer Center, New York
```

Authors: Anton Enright, Bino John, Chris Sander and Debora Marks  
(mirnatargets (at) cbio.mskcc.org - reaches all authors)

Software written by: Anton Enright  
Distributed for anyone to use under the GNU Public License (GPL),  
See the files 'COPYING' and 'LICENSE' for details

If you use this software please cite:  
Enright AJ, John B, Gaul U, Tuschl T, Sander C and Marks DS;  
(2003) Genome Biology; 5(1):R1.

miranda comes with ABSOLUTELY NO WARRANTY;  
This is free software, and you are welcome to redistribute it  
under certain conditions; type `miranda --license' for details.

Current Settings:

```
=====
Query Filename:    ./seq/mirna/sof_mirna.fasta
Reference Filename: ./seq/gene/sof/KY548506.fasta
Gap Open Penalty:-9.000000
Gap Extend Penalty: -4.000000
Score Threshold: 130.000000
Energy Threshold:-15.000000 kcal/mol
Scaling Parameter:  4.000000
=====
Read Sequence:sof-miR156 (20 nt)
Read
Sequence:KY548506.2.1|KY548506.2.1assembly=CEL116|chr=X|strand=forward
(9575 nt)
=====
Performing Scan: sof-miR156 vs
KY548506.2.1|KY548506.2.1assembly=CEL116|chr=X|strand=forward
=====
Score for this Scan:
No Hits Found above Threshold
Complete
```

```
Read Sequence:sof-miR159a (21 nt)
Read
Sequence:KY548506.2.1|KY548506.2.1assembly=CEL116|chr=X|strand=forward
(9575 nt)
=====
Performing Scan: sof-miR159a vs
KY548506.2.1|KY548506.2.1assembly=CEL116|chr=X|strand=forward
=====
Score for this Scan:
No Hits Found above Threshold
```

Complete

Read Sequence:sof-miR159b (21 nt)

Read

Sequence:KY548506.2.1|KY548506.2.1assembly=CEL116|chr=X|strand=forward  
(9575 nt)

=====

Performing Scan: sof-miR159b vs

KY548506.2.1|KY548506.2.1assembly=CEL116|chr=X|strand=forward

=====

Score for this Scan:

No Hits Found above Threshold

Complete

Read Sequence:sof-miR159c (21 nt)

Read

Sequence:KY548506.2.1|KY548506.2.1assembly=CEL116|chr=X|strand=forward  
(9575 nt)

=====

Performing Scan: sof-miR159c vs

KY548506.2.1|KY548506.2.1assembly=CEL116|chr=X|strand=forward

=====

Score for this Scan:

No Hits Found above Threshold

Complete

Read Sequence:sof-miR159d (21 nt)

Read

Sequence:KY548506.2.1|KY548506.2.1assembly=CEL116|chr=X|strand=forward  
(9575 nt)

=====

Performing Scan: sof-miR159d vs

KY548506.2.1|KY548506.2.1assembly=CEL116|chr=X|strand=forward

=====

Score for this Scan:

No Hits Found above Threshold

Complete

Read Sequence:sof-miR159e (21 nt)

Read

Sequence:KY548506.2.1|KY548506.2.1assembly=CEL116|chr=X|strand=forward  
(9575 nt)

=====

Performing Scan: sof-miR159e vs

KY548506.2.1|KY548506.2.1assembly=CEL116|chr=X|strand=forward

=====

Score for this Scan:

No Hits Found above Threshold

Complete

Read Sequence:sof-miR167a (21 nt)

Read

Sequence:KY548506.2.1|KY548506.2.1assembly=CEL116|chr=X|strand=forward  
(9575 nt)

```
=====
Performing Scan: sof-miR167a vs
KY548506.2.1|KY548506.2.1assembly=CEL116|chr=X|strand=forward
=====
```

Score for this Scan:  
No Hits Found above Threshold  
Complete

Read Sequence:sof-miR167b (21 nt)  
Read  
Sequence:KY548506.2.1|KY548506.2.1assembly=CEL116|chr=X|strand=forward  
(9575 nt)

```
=====
Performing Scan: sof-miR167b vs
KY548506.2.1|KY548506.2.1assembly=CEL116|chr=X|strand=forward
=====
```

Score for this Scan:  
No Hits Found above Threshold  
Complete

Read Sequence:sof-miR168a (21 nt)  
Read  
Sequence:KY548506.2.1|KY548506.2.1assembly=CEL116|chr=X|strand=forward  
(9575 nt)

```
=====
Performing Scan: sof-miR168a vs
KY548506.2.1|KY548506.2.1assembly=CEL116|chr=X|strand=forward
=====
```

Forward: Score: 146.000000 Q:2 to 20 R:547 to 568 Align Len (19)  
(68.42%) (84.21%)

Query: 3' caGGGCUAG-ACGUGGUUCGCU 5'  
          |:| | |: | |:| | | | |  
Ref: 5' aaCTCGCTTGTCATCAAGCGa 3'  
  
Energy: -23.510000 kCal/Mol

Scores for this hit:

>sof-miR168a  
KY548506.2.1|KY548506.2.1assembly=CEL116|chr=X|strand=forward  
146.00 -23.51 2 20 547 568 19 68.42% 84.21%

Forward: Score: 140.000000 Q:2 to 19 R:2562 to 2581 Align Len (17)  
(64.71%) (88.24%)

Query: 3' cagGGCUAGACGUGGUUCGCU 5'  
          ::| | | | | |:| | | | |  
Ref: 5' atgTTGATCCG-GCTAAGCGt 3'  
  
Energy: -19.139999 kCal/Mol

Scores for this hit:

```

>sof-miR168a
  KY548506.2.1|KY548506.2.1assembly=CEL116|chr=X|strand=forward
  140.00      -19.14      2 19  2562 2581   17   64.71%      88.24%

  Forward: Score: 132.000000  Q:3 to 17  R:1827 to 1845 Align Len (14)
(85.71%) (85.71%)

  Query:      3' cagggCUAGACGUGGUUCGcu 5'
              ||||| | |||||
  Ref:        5' tagtgGATCT-C-CCAAGCac 3'

  Energy:     -15.610000 kCal/Mol

Scores for this hit:
>sof-miR168a
  KY548506.2.1|KY548506.2.1assembly=CEL116|chr=X|strand=forward
  132.00      -15.61      3 17  1827 1845   14   85.71%      85.71%

Score for this Scan:
Seq1,Seq2,Tot Score,Tot Energy,Max Score,Max
Energy,Strand,Len1,Len2,Positions
>>sof-miR168a
  KY548506.2.1|KY548506.2.1assembly=CEL116|chr=X|strand=forward
  418.00      -58.26      146.00      -23.51      9      21   9575   547
2562 1827
Complete

Read Sequence:sof-miR168b (20 nt)
Read
Sequence:KY548506.2.1|KY548506.2.1assembly=CEL116|chr=X|strand=forward
(9575 nt)
=====
Performing Scan: sof-miR168b vs
KY548506.2.1|KY548506.2.1assembly=CEL116|chr=X|strand=forward
=====

  Forward: Score: 145.000000  Q:2 to 18  R:2562 to 2581 Align Len (16)
(68.75%) (87.50%)

  Query:      3' cagGGCUAGACGGGUUCGcu 5'
              ::||| | |:|||
  Ref:        5' atgTTGATCCGGCTAAGCGt 3'

  Energy:     -20.400000 kCal/Mol

Scores for this hit:
>sof-miR168b
  KY548506.2.1|KY548506.2.1assembly=CEL116|chr=X|strand=forward
  145.00      -20.40      2 18  2562 2581   16   68.75%      87.50%

  Forward: Score: 141.000000  Q:3 to 16  R:1827 to 1845 Align Len (13)
(92.31%) (92.31%)

```

Query: 3' cagggCUAGACGGGUUCGcu 5'  
 ||||| |||||  
 Ref: 5' tagtgGATCT-CCCAAGCac 3'  
 Energy: -19.320000 kCal/Mol

Scores for this hit:

>sof-miR168b  
 KY548506.2.1|KY548506.2.1assembly=CEL116|chr=X|strand=forward  
 141.00 -19.32 3 16 1827 1845 13 92.31% 92.31%

Forward: Score: 132.000000 Q:2 to 19 R:547 to 568 Align Len (19)  
 (63.16%) (78.95%)

Query: 3' caGGGCUAG-ACG-GGUUCGcu 5'  
 |:|| |:| :|||  
 Ref: 5' aaCTCGCTTGTCCATCAAGCGa 3'  
 Energy: -22.570000 kCal/Mol

Scores for this hit:

>sof-miR168b  
 KY548506.2.1|KY548506.2.1assembly=CEL116|chr=X|strand=forward  
 132.00 -22.57 2 19 547 568 19 63.16% 78.95%

Score for this Scan:

Seq1,Seq2,Tot Score,Tot Energy,Max Score,Max  
 Energy,Strand,Len1,Len2,Positions  
 >>sof-miR168b

KY548506.2.1|KY548506.2.1assembly=CEL116|chr=X|strand=forward  
 418.00 -62.29 145.00 -22.57 10 20 9575  
 2562 1827 547  
 Complete

Read Sequence:sof-miR396 (21 nt)

Read

Sequence:KY548506.2.1|KY548506.2.1assembly=CEL116|chr=X|strand=forward  
 (9575 nt)

=====

Performing Scan: sof-miR396 vs

KY548506.2.1|KY548506.2.1assembly=CEL116|chr=X|strand=forward

=====

Forward: Score: 142.000000 Q:2 to 16 R:3634 to 3655 Align Len (15)  
 (73.33%) (93.33%)

Query: 3' gucaagUUCUUUC-GACACCUu 5'  
 ::||| :|||  
 Ref: 5' gctcggGGGAAAGTTTGTGGa 3'  
 Energy: -20.270000 kCal/Mol

Scores for this hit:

```
>sof-miR396 KY548506.2.1|KY548506.2.1assembly=CEL116|chr=X|strand=forward
      142.00      -20.27      2 16 3634 3655 15 73.33% 93.33%
```

Score for this Scan:

Seq1,Seq2,Tot Score,Tot Energy,Max Score,Max  
Energy,Strand,Len1,Len2,Positions

>>sof-miR396

```
      KY548506.2.1|KY548506.2.1assembly=CEL116|chr=X|strand=forward
      142.00      -20.27      142.00      -20.27      11 21 9575
```

3634

Complete

Read Sequence:sof-miR408a (21 nt)

Read

Sequence:KY548506.2.1|KY548506.2.1assembly=CEL116|chr=X|strand=forward  
(9575 nt)

=====

Performing Scan: sof-miR408a vs

KY548506.2.1|KY548506.2.1assembly=CEL116|chr=X|strand=forward

=====

Forward: Score: 130.000000 Q:2 to 20 R:139 to 161 Align Len (20)  
(75.00%) (80.00%)

Query: 3' cgGUCCCUUCU-CCGU-CACGUc 5'

| || :||| |||| |||||

Ref: 5' ttCCGGCGAGATGGCAGGTGCA 3'

Energy: -23.270000 kCal/Mol

Scores for this hit:

>sof-miR408a

```
      KY548506.2.1|KY548506.2.1assembly=CEL116|chr=X|strand=forward
      130.00      -23.27      2 20 139 161 20 75.00% 80.00%
```

Score for this Scan:

Seq1,Seq2,Tot Score,Tot Energy,Max Score,Max  
Energy,Strand,Len1,Len2,Positions

>>sof-miR408a

```
      KY548506.2.1|KY548506.2.1assembly=CEL116|chr=X|strand=forward
      130.00      -23.27      130.00      -23.27      12 21 9575 139
```

Complete

Read Sequence:sof-miR408b (21 nt)

Read

Sequence:KY548506.2.1|KY548506.2.1assembly=CEL116|chr=X|strand=forward  
(9575 nt)

=====

Performing Scan: sof-miR408b vs

KY548506.2.1|KY548506.2.1assembly=CEL116|chr=X|strand=forward

=====

Forward: Score: 130.000000 Q:2 to 20 R:139 to 161 Align Len (20)  
(75.00%) (80.00%)

Query: 3' cgGUCCCUUCU-CCGU-CACGUc 5'  
| || :||| |||| |||||

Ref: 5' ttCCGGCGAGATGGCAGGTGCAt 3'

Energy: -23.270000 kCal/Mol

Scores for this hit:

>sof-miR408b

KY548506.2.1|KY548506.2.1assembly=CEL116|chr=X|strand=forward  
130.00 -23.27 2 20 139 161 20 75.00% 80.00%

Score for this Scan:

Seq1,Seq2,Tot Score,Tot Energy,Max Score,Max  
Energy,Strand,Len1,Len2,Positions

>>sof-miR408b

KY548506.2.1|KY548506.2.1assembly=CEL116|chr=X|strand=forward  
130.00 -23.27 130.00 -23.27 13 21 9575 139

Complete

Read Sequence:sof-miR408c (21 nt)

Read

Sequence:KY548506.2.1|KY548506.2.1assembly=CEL116|chr=X|strand=forward  
(9575 nt)

=====

Performing Scan: sof-miR408c vs

KY548506.2.1|KY548506.2.1assembly=CEL116|chr=X|strand=forward

=====

Forward: Score: 130.000000 Q:2 to 20 R:139 to 161 Align Len (20)  
(75.00%) (80.00%)

Query: 3' cgGUCCCUUCU-CCGU-CACGUc 5'  
| || :||| |||| |||||

Ref: 5' ttCCGGCGAGATGGCAGGTGCAt 3'

Energy: -23.270000 kCal/Mol

Scores for this hit:

>sof-miR408c

KY548506.2.1|KY548506.2.1assembly=CEL116|chr=X|strand=forward  
130.00 -23.27 2 20 139 161 20 75.00% 80.00%

Score for this Scan:

Seq1,Seq2,Tot Score,Tot Energy,Max Score,Max  
Energy,Strand,Len1,Len2,Positions

>>sof-miR408c

KY548506.2.1|KY548506.2.1assembly=CEL116|chr=X|strand=forward  
130.00 -23.27 130.00 -23.27 14 21 9575 139

Complete

Read Sequence:sof-miR408d (21 nt)

Read  
Sequence:KY548506.2.1|KY548506.2.1assembly=CEL116|chr=X|strand=forward  
(9575 nt)

=====

Performing Scan: sof-miR408d vs  
KY548506.2.1|KY548506.2.1assembly=CEL116|chr=X|strand=forward

=====

Forward: Score: 130.000000 Q:2 to 20 R:139 to 161 Align Len (20)  
(75.00%) (80.00%)

Query: 3' cgGUCCCUUCU-CCGU-CACGUc 5'

| || :||| |||| |||||

Ref: 5' ttCCGGCGAGATGGCAGGTGCA 3'

Energy: -23.270000 kCal/Mol

Scores for this hit:

>sof-miR408d

KY548506.2.1|KY548506.2.1assembly=CEL116|chr=X|strand=forward  
130.00 -23.27 2 20 139 161 20 75.00% 80.00%

Score for this Scan:

Seq1,Seq2,Tot Score,Tot Energy,Max Score,Max  
Energy,Strand,Len1,Len2,Positions

>>sof-miR408d

KY548506.2.1|KY548506.2.1assembly=CEL116|chr=X|strand=forward  
130.00 -23.27 130.00 -23.27 15 21 9575 139

Complete

Read Sequence:sof-miR408e (21 nt)

Read

Sequence:KY548506.2.1|KY548506.2.1assembly=CEL116|chr=X|strand=forward  
(9575 nt)

=====

Performing Scan: sof-miR408e vs  
KY548506.2.1|KY548506.2.1assembly=CEL116|chr=X|strand=forward

=====

Score for this Scan:

No Hits Found above Threshold

Complete

Read Sequence:ssp-miR166 (21 nt)

Read

Sequence:KY548506.2.1|KY548506.2.1assembly=CEL116|chr=X|strand=forward  
(9575 nt)

=====

Performing Scan: ssp-miR166 vs  
KY548506.2.1|KY548506.2.1assembly=CEL116|chr=X|strand=forward

=====

Forward: Score: 146.000000 Q:2 to 20 R:4178 to 4199 Align Len (19)  
(68.42%) (84.21%)



Query: 3' ccCCUU-ACUUCGGACCAGGCu 5'  
      |||| |::| |||||:|  
Ref: 5' atGGAACCTGGGACTGGTTCGa 3'

Energy: -22.320000 kCal/Mol

Scores for this hit:

>ssp-miR166 KY548506.2.1|KY548506.2.1assembly=CEL116|chr=X|strand=forward  
146.00 -22.32 2 20 4178 4199 19 68.42% 84.21%

Score for this Scan:

Seq1,Seq2,Tot Score,Tot Energy,Max Score,Max  
Energy,Strand,Len1,Len2,Positions

>>ssp-miR166  
KY548506.2.1|KY548506.2.1assembly=CEL116|chr=X|strand=forward  
146.00 -22.32 146.00 -22.32 17 21 9575

4178

Complete

Read Sequence:ssp-miR169 (21 nt)

Read

Sequence:KY548506.2.1|KY548506.2.1assembly=CEL116|chr=X|strand=forward  
(9575 nt)

=====

Performing Scan: ssp-miR169 vs

KY548506.2.1|KY548506.2.1assembly=CEL116|chr=X|strand=forward

=====

Forward:Score: 133.000000 Q:2 to 16 R:7798 to 7817 Align Len (14)  
(71.43%) (85.71%)

Query: 3' ggccguUCAGUAGGAACCGAu 5'  
      :|| || :|||||  
Ref: 5' actaatGGTAAT-TTTGGCTt 3'

Energy: -15.520000 kCal/Mol

Scores for this hit:

>ssp-miR169 KY548506.2.1|KY548506.2.1assembly=CEL116|chr=X|strand=forward  
133.00 -15.52 2 16 7798 7817 14 71.43% 85.71%

Score for this Scan:

Seq1,Seq2,Tot Score,Tot Energy,Max Score,Max  
Energy,Strand,Len1,Len2,Positions

>>ssp-miR169  
KY548506.2.1|KY548506.2.1assembly=CEL116|chr=X|strand=forward  
133.00 -15.52 133.00 -15.52 18 21 9575

7798

Complete

Read Sequence:ssp-miR437a (21 nt)

Read

Sequence:KY548506.2.1|KY548506.2.1assembly=CEL116|chr=X|strand=forward  
(9575 nt)

```
=====
Performing Scan: ssp-miR437a vs
KY548506.2.1|KY548506.2.1assembly=CEL116|chr=X|strand=forward
=====
Score for this Scan:
No Hits Found above Threshold
Complete
```

```
Read Sequence:ssp-miR437b (21 nt)
Read
Sequence:KY548506.2.1|KY548506.2.1assembly=CEL116|chr=X|strand=forward
(9575 nt)
```

```
=====
Performing Scan: ssp-miR437b vs
KY548506.2.1|KY548506.2.1assembly=CEL116|chr=X|strand=forward
=====
Score for this Scan:
No Hits Found above Threshold
Complete
```

```
Read Sequence:ssp-miR437c (21 nt)
Read
Sequence:KY548506.2.1|KY548506.2.1assembly=CEL116|chr=X|strand=forward
(9575 nt)
```

```
=====
Performing Scan: ssp-miR437c vs
KY548506.2.1|KY548506.2.1assembly=CEL116|chr=X|strand=forward
=====
Score for this Scan:
No Hits Found above Threshold
Complete
```

```
Read Sequence:ssp-miR528 (21 nt)
Read
Sequence:KY548506.2.1|KY548506.2.1assembly=CEL116|chr=X|strand=forward
(9575 nt)
```

```
=====
Performing Scan: ssp-miR528 vs
KY548506.2.1|KY548506.2.1assembly=CEL116|chr=X|strand=forward
=====
```

```
Forward: Score: 146.000000 Q:2 to 19 R:6376 to 6393 Align Len (17)
(70.59%) (76.47%)
```

```
Query:      3' gagGAGACGUACGGGAAGGu 5'
           ||:| ||  |||||
Ref:        5' ggaCTTTCCA--CCCTTCCc 3'
```

```
Energy: -15.820000 kCal/Mol
```

```
Scores for this hit:
>ssp-miR528 KY548506.2.1|KY548506.2.1assembly=CEL116|chr=X|strand=forward
146.00      -15.82      2 19 6376 6393 17 70.59% 76.47%
```

Score for this Scan:

Seq1,Seq2,Tot Score,Tot Energy,Max Score,Max  
Energy,Strand,Len1,Len2,Positions

>>ssp-miR528

KY548506.2.1|KY548506.2.1assembly=CEL116|chr=X|strand=forward

146.00 -15.82 146.00 -15.82 22 21 9575

6376

Complete

Read Sequence:ssp-miR827 (21 nt)

Read

Sequence:KY548506.2.1|KY548506.2.1assembly=CEL116|chr=X|strand=forward  
(9575 nt)

=====

Performing Scan: ssp-miR827 vs

KY548506.2.1|KY548506.2.1assembly=CEL116|chr=X|strand=forward

=====

Score for this Scan:

No Hits Found above Threshold

Complete

Read Sequence:ssp-miR444a (21 nt)

Read

Sequence:KY548506.2.1|KY548506.2.1assembly=CEL116|chr=X|strand=forward  
(9575 nt)

=====

Performing Scan: ssp-miR444a vs

KY548506.2.1|KY548506.2.1assembly=CEL116|chr=X|strand=forward

=====

Forward: Score: 132.000000 Q:2 to 13 R:8501 to 8521 Align Len (11)  
(72.73%) (90.91%)

Query: 3' uucgaacucCGUUGUUGACGu 5'

| | : | | : | | | |

Ref: 5' ccggcaaccGGAGCAGCTGCa 3'

Energy: -18.420000 kCal/Mol

Scores for this hit:

>ssp-miR444a

KY548506.2.1|KY548506.2.1assembly=CEL116|chr=X|strand=forward

132.00 -18.42 2 13 8501 8521 11 72.73% 90.91%

Score for this Scan:

Seq1,Seq2,Tot Score,Tot Energy,Max Score,Max  
Energy,Strand,Len1,Len2,Positions

>>ssp-miR444a

KY548506.2.1|KY548506.2.1assembly=CEL116|chr=X|strand=forward

132.00 -18.42 132.00 -18.42 24 21 9575

8501

Complete

Read Sequence:ssp-miR444b (21 nt)

Read  
Sequence:KY548506.2.1|KY548506.2.1assembly=CEL116|chr=X|strand=forward  
(9575 nt)

=====

Performing Scan: ssp-miR444b vs  
KY548506.2.1|KY548506.2.1assembly=CEL116|chr=X|strand=forward  
=====

Forward: Score: 132.000000 Q:2 to 13 R:8501 to 8521 Align Len (11)  
(72.73%) (90.91%)

Query: 3' uucgaacucCGUUGUUGACGu 5'  
                                  | |:|:|:|

Ref: 5' ccggcaaccGGAGCAGCTGCa 3'

Energy: -18.420000 kCal/Mol

Scores for this hit:

>ssp-miR444b  
KY548506.2.1|KY548506.2.1assembly=CEL116|chr=X|strand=forward  
132.00 -18.42 2 13 8501 8521 11 72.73% 90.91%

Score for this Scan:

Seq1,Seq2,Tot Score,Tot Energy,Max Score,Max  
Energy,Strand,Len1,Len2,Positions

>>ssp-miR444b  
KY548506.2.1|KY548506.2.1assembly=CEL116|chr=X|strand=forward  
132.00 -18.42 132.00 -18.42 25 21 9575  
8501  
Complete

Read Sequence:ssp-miR444c-3p (21 nt)

Read

Sequence:KY548506.2.1|KY548506.2.1assembly=CEL116|chr=X|strand=forward  
(9575 nt)

=====

Performing Scan: ssp-miR444c-3p vs  
KY548506.2.1|KY548506.2.1assembly=CEL116|chr=X|strand=forward  
=====

Forward: Score: 130.000000 Q:2 to 11 R:8501 to 8521 Align Len (9)  
(77.78%) (100.00%)

Query: 3' uucgaacucugUUGUUGACGu 5'  
                                  | |:|:|:|

Ref: 5' ccggcaaccggAGCAGCTGCa 3'

Energy: -18.420000 kCal/Mol

Scores for this hit:

>ssp-miR444c-3p  
KY548506.2.1|KY548506.2.1assembly=CEL116|chr=X|strand=forward  
130.00 -18.42 2 11 8501 8521 9 77.78% 100.00%

Forward: Score: 130.000000 Q:3 to 16 R:9268 to 9289 Align Len (14)  
(85.71%) (92.86%)

Query: 3' uucgaaCUCUGU-UGUUGACgu 5'

||||| |||:|

Ref: 5' tacagaGAGACACACAGCTGgc 3'

Energy: -19.360001 kCal/Mol

Scores for this hit:

>ssp-miR444c-3p

KY548506.2.1|KY548506.2.1assembly=CEL116|chr=X|strand=forward  
130.00 -19.36 3 16 9268 9289 14 85.71% 92.86%

Score for this Scan:

Seq1,Seq2,Tot Score,Tot Energy,Max Score,Max  
Energy,Strand,Len1,Len2,Positions

>>ssp-miR444c-3p

KY548506.2.1|KY548506.2.1assembly=CEL116|chr=X|strand=forward  
260.00 -37.78 130.00 -19.36 26 21 9575

8501 9268

Complete

Read Sequence:ssp-miR1128 (21 nt)

Read

Sequence:KY548506.2.1|KY548506.2.1assembly=CEL116|chr=X|strand=forward  
(9575 nt)

=====

Performing Scan: ssp-miR1128 vs

KY548506.2.1|KY548506.2.1assembly=CEL116|chr=X|strand=forward

=====

Score for this Scan:

No Hits Found above Threshold

Complete

Read Sequence:ssp-miR1432 (21 nt)

Read

Sequence:KY548506.2.1|KY548506.2.1assembly=CEL116|chr=X|strand=forward  
(9575 nt)

=====

Performing Scan: ssp-miR1432 vs

KY548506.2.1|KY548506.2.1assembly=CEL116|chr=X|strand=forward

=====

Forward: Score: 133.000000 Q:2 to 20 R:7523 to 7546 Align Len (21)  
(66.67%) (71.43%)

Query: 3' caGCC-ACAGUAG--AAAGGACUc 5'

||| || ||| |||:|

Ref: 5' ggCGGTTGGAATCGACTTCTTGAg 3'

Energy: -22.320000 kCal/Mol

Scores for this hit:

>ssp-miR1432

|                                                               |        |   |    |      |      |    |               |
|---------------------------------------------------------------|--------|---|----|------|------|----|---------------|
| KY548506.2.1 KY548506.2.1assembly=CEL116 chr=X strand=forward |        |   |    |      |      |    |               |
| 133.00                                                        | -22.32 | 2 | 20 | 7523 | 7546 | 21 | 66.67% 71.43% |

Score for this Scan:

Seq1,Seq2,Tot Score,Tot Energy,Max Score,Max

Energy,Strand,Len1,Len2,Positions

>>ssp-miR1432

|                                                               |        |        |        |    |    |      |  |
|---------------------------------------------------------------|--------|--------|--------|----|----|------|--|
| KY548506.2.1 KY548506.2.1assembly=CEL116 chr=X strand=forward |        |        |        |    |    |      |  |
| 133.00                                                        | -22.32 | 133.00 | -22.32 | 28 | 21 | 9575 |  |

7523

Complete

Scan Complete

## **RNA22 v2 results**

Maximum folding energy was set -14Kcal/mol

Results have been computed and are shown below. If there are no results shown, it means your chosen parameters yielded no results. Note: The p-value represents the likelihood that the target site loci is random. That is, a lower p-value represents a greater chance that the loci contains a valid MRE

| <b>miR Name</b> | <b>transcript name</b>               | <b>leftmost position of predicted target site</b> | <b>folding energy (in - Kcal/mol)</b> | <b>heteroduplex</b>                                                        | <b>p value</b> |
|-----------------|--------------------------------------|---------------------------------------------------|---------------------------------------|----------------------------------------------------------------------------|----------------|
| sof_miR168a     | KY548506.1<br>Sugarcane mosaic virus | 846                                               | -14.20                                | ATTCAGATC--CAC-AAGCGA<br> :                <br>CAGGGCTAGACGTGGTTCGCT       | 3.2E-1         |
| sof_miR168b     | KY548506.1<br>Sugarcane mosaic virus | 846                                               | -14.60                                | ATTCAGATC--CACAAGCGA<br> :            <br>CAGGGCTAGACGGGTTCGCT             | 3.2E-1         |
| sof_miR168a     | KY548506.1<br>Sugarcane mosaic virus | 1296                                              | -18.70                                | CTCCTGAGGACGCAATGAAAGCGA<br>   :              <br>CAGGGCT-AGACGT--GGTTCGCT | 1.24E-1        |
| ssp_miR1432     | KY548506.1<br>Sugarcane mosaic virus | 1315                                              | -15.40                                | AGCGAGTGTC-TCTTTGTTGGA<br>              : <br>CAGC-CACAGTAGAAAGGACTC       | 1.24E-1        |
| sof_miR159c     | KY548506.1<br>Sugarcane mosaic virus | 3730                                              | -17.80                                | AGGAGC-C--GTTGGTTCAGG<br>           : : <br>TCCTCGAGGGAAGTTAGGTTC          | 7.65E-2        |
| sof_miR159c     | KY548506.1<br>Sugarcane mosaic virus | 3847                                              | -18.00                                | AGGTCCACCTTTCAATGTAAG<br>       : : :   : <br>TCCTCGAGGGAAGTTAGGTTC        | 5.35E-2        |
| ssp_miR444a     | KY548506.1<br>Sugarcane mosaic virus | 5311                                              | -14.20                                | AGGC-ACAGGCATGCAATTCCA<br> :           : :    <br>TTCGAACTCCGT-TGTTGACGT   | 8.17E-3        |
| ssp_miR444b     | KY548506.1<br>Sugarcane mosaic virus | 5311                                              | -14.20                                | AGGC-ACAGGCATGCAATTCCA<br> :           : :    <br>TTCGAACTCCGT-TGTTGACGT   | 8.17E-3        |
| sof_miR408a     | KY548506.1<br>Sugarcane mosaic virus | 5538                                              | -15.30                                | ACCAAGGAAAGAACAAGCGCAG<br>                   <br>CGGTCCCTT-CTCCGTCACGTC    | 1.57E-1        |
| sof_miR408b     | KY548506.1<br>Sugarcane mosaic virus | 5538                                              | -15.30                                | ACCAAGGAAAGAACAAGCGCAG<br>                   <br>CGGTCCCTT-CTCCGTCACGTC    | 1.57E-1        |
| sof_miR408c     | KY548506.1<br>Sugarcane mosaic virus | 5538                                              | -15.30                                | ACCAAGGAAAGAACAAGCGCAG<br>                   <br>CGGTCCCTT-CTCCGTCACGTC    | 1.57E-1        |

| miR Name       | transcript name                      | leftmost position of predicted target site | folding energy (in - Kcal/mol) | heteroduplex                                                                            | p value |
|----------------|--------------------------------------|--------------------------------------------|--------------------------------|-----------------------------------------------------------------------------------------|---------|
| sof_miR408d    | KY548506.1<br>Sugarcane mosaic virus | 5538                                       | -15.30                         | ACCAAGGAAAGAACAAGCGCAG<br>                   <br>CGGTCCCTT-CTCCGTCACGTC                 | 1.57E-1 |
| sof_miR408e    | KY548506.1<br>Sugarcane mosaic virus | 5538                                       | -15.30                         | ACCAAGGAAAGAACAAGCGCAG<br>                   <br>CGGTCCCTT-CTCAGTCACGTC                 | 1.57E-1 |
| ssp_miR444c_3p | KY548506.1<br>Sugarcane mosaic virus | 5552                                       | -18.50                         | AAGCGCAGTAGACAGAAGCTGCG<br>           :  :    :<br>TTCG-AAC-TCTGTTGTTGACGT              | 1.57E-1 |
| sof_miR396     | KY548506.1<br>Sugarcane mosaic virus | 6821                                       | -14.20                         | AGTGTCTGA-AGAGCAATGTGGAA<br>  :   :         <br>GTCAAGTTCTTTTCG--ACACCTT                | 2.21E-1 |
| ssp_miR444a    | KY548506.1<br>Sugarcane mosaic virus | 8502                                       | -18.00                         | CGGCAACCGG-AGCAGCTGCA<br>:       : :     <br>TTCGAACTCCGTTGTTGACGT                      | 9.19E-2 |
| ssp_miR444b    | KY548506.1<br>Sugarcane mosaic virus | 8502                                       | -18.00                         | CGGCAACCGG-AGCAGCTGCA<br>:       : :     <br>TTCGAACTCCGTTGTTGACGT                      | 9.19E-2 |
| ssp_miR444c_3p | KY548506.1<br>Sugarcane mosaic virus | 9181                                       | -14.30                         | CCACATGCAGATGAAGGCTGCA<br>         :    <br>TTCGAAC-TCTGTTGTTGACGT                      | 3.07E-1 |
| sof_miR167a    | KY548506.1<br>Sugarcane mosaic virus | 9520                                       | -14.10                         | CGGA-<br>CAGCGCTGAGGATGGCTTTG<br> :           : : : : <br>GTCTAGT-ACGA--CC-<br>GTCGAAGT | 2.11E-1 |
| sof_miR167b    | KY548506.1<br>Sugarcane mosaic virus | 9520                                       | -14.10                         | CGGA-<br>CAGCGCTGAGGATGGCTTTG<br> :           : : : : <br>GTCTAGT-ACGA--CC-<br>GTCGAAGT | 2.11E-1 |



Tapirhybrid

```
#-----  
# Search parameters  
# score <= 9  
# mfe ratio >= 0.2  
#-----
```

```
target      KY548506.1  
miRNA       sof-miR159c  
score       7  
mfe_ratio   0.58  
start       3847  
seed_gap    0  
seed_mismatch 1  
seed_gu     2  
gap         0  
mismatch    3  
gu          0  
miRNA_3'    UCCUCGAGGGAAGUUAGGUUC  
aln         |||.|.|||o|||||.o|||  
target_5'   AGGUCCACCUUUCAAUGUAAG  
//
```

```
target      KY548506.1  
miRNA       sof-miR159e  
score       8  
mfe_ratio   0.46  
start       1159  
seed_gap    0  
seed_mismatch 2  
seed_gu     0  
gap         0  
mismatch    4  
gu          0  
miRNA_3'    UUCUCGAGGAAAGUUAGGUUU  
aln         ||.|||.|.|||.|||||.||  
target_5'   AAAAGACCGUUGCAAUCCUAA  
//
```

```
target      KY548506.1  
miRNA       sof-miR168b  
score       9  
mfe_ratio   0.46  
start       406  
seed_gap    0  
seed_mismatch 2  
seed_gu     1  
gap         0  
mismatch    4  
gu          0  
miRNA_3'    CAGGGCUAGACGGGUUCGCU  
aln         ..|.|||.|||.|||.|||o||  
target_5'   UCCACGACCUACCAAAGUGA  
//
```

```
target      KY548506.1  
miRNA       ssp-miR437a  
score       8  
mfe_ratio   0.69  
start       4869
```

```

seed_gap      0
seed_mismatch 3
seed_gu       0
gap           1
mismatch      1
gu            0
miRNA_3'      UUCAGUUUGAAGAGAUUGAAA
aln           |||||.|||||..|||||..
target_5'     AAGUC-AACUUCAAUAACUGG
//
target        KY548506.1
miRNA         ssp-miR528
score         8.5
mfe_ratio     0.60
start         122
seed_gap      0
seed_mismatch 3
seed_gu       0
gap           1
mismatch      1
gu            1
miRNA_3'      GAGG-AGACGUACGGGGAAGGU
aln           ||||.||.||||.||..|||||o
target_5'     CUCCUUCGGCAUUCGACUCCG
//
target        KY548506.1
miRNA         ssp-miR444c-3p
score         7.5
mfe_ratio     0.59
start         5583
seed_gap      0
seed_mismatch 2
seed_gu       1
gap           0
mismatch      2
gu            1
miRNA_3'      UUCGAACUCUGUUGUUGACGU
aln           ||||..|||||o|||||.|.lo
target_5'     AAGCACGAGAUAAACAAUACG
//
target        KY548506.1
miRNA         ssp-miR1128
score         8
mfe_ratio     0.66
start         4534
seed_gap      0
seed_mismatch 3
seed_gu       1
gap           1
mismatch      0
gu            0
miRNA_3'      AAACCCUGCCUCCCUCAUCAU
aln           |||||..|||..o|||.l
target_5'     UUUGGGAC-GAGUUGGUAGGA
//

```

#Please import the downloaded file into Microsoft Excel or other  
spreadsheet software

| miRNA_Acc.  | Target_Acc. | Expectation | UPE\$ | miRNA_start | miRNA_end | Target_start | Target_end | miRNA_aligned_fragment | alignment          | Target_aligned_fragment | Inhibition | Target_Desc.                         | Multiplicity |
|-------------|-------------|-------------|-------|-------------|-----------|--------------|------------|------------------------|--------------------|-------------------------|------------|--------------------------------------|--------------|
| sof-miR159a | KY548506.1  | 5.5         | -1.0  | 1           | 21        | 5911         | 5931       | UUUGGAUUGAAGGGAGCUCUG  | ::: :::            | GCAAGCUUUCUUUAUUCAAAA   |            | Cleavage Sugarcane mosaic virus 3    |              |
| sof-miR159b | KY548506.1  | 5.5         | -1.0  | 1           | 21        | 5911         | 5931       | UUUGGAUUGAAGGGAGCUCUG  | ::: :::            | GCAAGCUUUCUUUAUUCAAAA   |            | Cleavage Sugarcane mosaic virus 3    |              |
| sof-miR159c | KY548506.1  | 5.5         | -1.0  | 1           | 21        | 3847         | 3867       | CUUGGAUUGAAGGGAGCUCCU  | ::: : ::: :::      | AGGUCCACCUUUCAAUGUAAG   |            | Cleavage Sugarcane mosaic virus 2    |              |
| sof-miR159d | KY548506.1  | 5.5         | -1.0  | 1           | 21        | 5911         | 5931       | UUUGGAUUGAAGGGAGCUCUG  | ::: :::            | GCAAGCUUUCUUUAUUCAAAA   |            | Cleavage Sugarcane mosaic virus 3    |              |
| sof-miR159e | KY548506.1  | 5.5         | -1.0  | 1           | 21        | 3847         | 3867       | UUUGGAUUGAAGGGAGCUCUU  | ::: : ::: :::      | AGGUCCACCUUUCAAUGUAAG   |            | Cleavage Sugarcane mosaic virus 2    |              |
| sof-miR168a | KY548506.1  | 5.5         | -1.0  | 1           | 21        | 9129         | 9149       | UCGCUUGGUGCAGAUCCGGGAC | ::: ::: :::        | CUUUCGAUUUUUACGAAGUGA   |            | Translation Sugarcane mosaic virus 3 |              |
| sof-miR156  | KY548506.1  | 6.5         | -1.0  | 1           | 20        | 5909         | 5928       | UGACAGAAGAGAGUGAGCAC   | ::: ::: :::        | UUGCAAGCUUUCUUUAUUCA    |            | Cleavage Sugarcane mosaic virus 1    |              |
| sof-miR159a | KY548506.1  | 6.5         | -1.0  | 1           | 21        | 1804         | 1824       | UUUGGAUUGAAGGGAGCUCUG  | ::: ::: ::: :::    | AGGAAAUUCCAUGACCCAAA    |            | Translation Sugarcane mosaic virus 3 |              |
| sof-miR159b | KY548506.1  | 6.5         | -1.0  | 1           | 21        | 1804         | 1824       | UUUGGAUUGAAGGGAGCUCUG  | ::: ::: ::: :::    | AGGAAAUUCCAUGACCCAAA    |            | Translation Sugarcane mosaic virus 3 |              |
| sof-miR159c | KY548506.1  | 6.5         | -1.0  | 1           | 21        | 5911         | 5931       | CUUGGAUUGAAGGGAGCUCCU  | ::: ::: ::: :::    | GCAAGCUUUCUUUAUUCAAAA   |            | Cleavage Sugarcane mosaic virus 2    |              |
| sof-miR159d | KY548506.1  | 6.5         | -1.0  | 1           | 21        | 1804         | 1824       | UUUGGAUUGAAGGGAGCUCUG  | ::: ::: ::: :::    | AGGAAAUUCCAUGACCCAAA    |            | Translation Sugarcane mosaic virus 3 |              |
| sof-miR168a | KY548506.1  | 6.5         | -1.0  | 1           | 21        | 2971         | 2991       | UCGCUUGGUGCAGAUCCGGGAC | : .. ::: ::: :::   | AUAUUGGUUUGUACCAGACGU   |            | Cleavage Sugarcane mosaic virus 3    |              |
| sof-miR168b | KY548506.1  | 6.5         | -1.0  | 1           | 20        | 2562         | 2581       | UCGCUUGGUGCAGAUCCGGGAC | : .. ::: : ::: ::: | AUGUUGAUCCGGCUAAGCGU    |            | Translation Sugarcane mosaic virus 1 |              |
| sof-miR396  | KY548506.1  | 6.5         | -1.0  | 1           | 21        | 7116         | 7135       | UCCACAGCUUUCUUGAACUG   | ::: ::: ::: :::    | CAGUU-GAGAGAGUCGUGAAA   |            | Cleavage Sugarcane mosaic virus 1    |              |
| sof-miR159a | KY548506.1  | 7.0         | -1.0  | 1           | 21        | 3847         | 3867       | UUUGGAUUGAAGGGAGCUCUG  | : ::: ::: :::      | AGGUCCACCUUUCAAUGUAAG   |            | Cleavage Sugarcane mosaic virus 3    |              |
| sof-miR159b | KY548506.1  | 7.0         | -1.0  | 1           | 21        | 3847         | 3867       | UUUGGAUUGAAGGGAGCUCUG  | : ::: ::: :::      | AGGUCCACCUUUCAAUGUAAG   |            | Cleavage Sugarcane mosaic virus 3    |              |

```

sof-miR159d KY548506.1 7.0 -1.0 1 21 3847 3867
    UUUGGAUUGAAGGGAGCUCUG : ::::::::::: .... AGGUCCACCUUCAAUGUAAG
    Cleavage Sugarcane mosaic virus 3
sof-miR159e KY548506.1 7.0 -1.0 1 21 6712 6732
    UUUGGAUUGAAAGGAGCUCUU :::: : :: ::::::::::: AGGAUGGCAUUAAAUCCGAA
    Translation Sugarcane mosaic virus 2
sof-miR167a KY548506.1 7.0 -1.0 1 21 2427 2447
    UGAAGCUGCCAGCAUGAUCUG ::::: :::: :. ::::: AAGGUCUAGCUGCUAUUUUCG
    Cleavage Sugarcane mosaic virus 1
sof-miR167b KY548506.1 7.0 -1.0 1 21 2427 2447
    UGAAGCUGCCAGCAUGAUCUG ::::: :::: :. ::::: AAGGUCUAGCUGCUAUUUUCG
    Cleavage Sugarcane mosaic virus 1
sof-miR168a KY548506.1 7.0 -1.0 1 21 547 568 UCGCUUGGUGCA-
GAUCGGGAC :::: :. : ::::::::::: AACUCGCUUGUCCAUCAAGCGA Translation
    Sugarcane mosaic virus 3
sof-miR408e KY548506.1 7.0 -1.0 1 21 6544 6564
    CUGCACUGACUCUUCCCUGGC :: :. :. ::::: ::::: AACAACGGACGGUCA AUGUGG
    Cleavage Sugarcane mosaic virus 1

```

|                       |                           |     |      |   |    |                        |      |
|-----------------------|---------------------------|-----|------|---|----|------------------------|------|
| ssp-miR444c-3p        | KY548506.1                | 5.5 | -1.0 | 1 | 21 | 2367                   | 2387 |
| UGCAGUUGUUGUCUCAAGCUU | ::::: : ::::::::::        |     |      |   |    | UAGCUUUUAUAAUAAUUGUU   |      |
| Cleavage              | Sugarcane mosaic virus 6  |     |      |   |    |                        |      |
| ssp-miR166            | KY548506.1                | 6.0 | -1.0 | 1 | 21 | 4179                   | 4199 |
| UCGGACCAGGCUUCAUCCCC  | :: : : ... ::::::::::     |     |      |   |    | UGGAACUUGGGACUGGUUCGA  |      |
| Translation           | Sugarcane mosaic virus 1  |     |      |   |    |                        |      |
| ssp-miR444c-3p        | KY548506.1                | 6.0 | -1.0 | 1 | 21 | 5583                   | 5603 |
| UGCAGUUGUUGUCUCAAGCUU | :::: : :::::::::: : ::    |     |      |   |    | AAGCACGAGAUAAACAAAUACG |      |
| Cleavage              | Sugarcane mosaic virus 6  |     |      |   |    |                        |      |
| ssp-miR444b.1         | KY548506.1                | 6.5 | -1.0 | 1 | 21 | 7142                   | 7162 |
| UUGUGGCUUUCUUGCAAGUUG | ... :::::::::: : : ::::   |     |      |   |    | CGGGAUGCAGGAAUGCAGCAA  |      |
| Cleavage              | Sugarcane mosaic virus 4  |     |      |   |    |                        |      |
| ssp-miR444b.1         | KY548506.1                | 6.5 | -1.0 | 1 | 21 | 3992                   | 4011 |
| UUGUGGCUUUCUUGCAAGUUG | ::::: : : :: :::::        |     |      |   |    | AUAUUUG-ACGAAUGCCACAU  |      |
| Cleavage              | Sugarcane mosaic virus 4  |     |      |   |    |                        |      |
| ssp-miR444c-3p        | KY548506.1                | 6.5 | -1.0 | 1 | 21 | 3441                   | 3460 |
| UGCAGUUGUUGUCUCAAGCUU | ::::: : :::::::::: : :::: |     |      |   |    | GAGUUUU-GACAACACCUGUU  |      |
| Cleavage              | Sugarcane mosaic virus 6  |     |      |   |    |                        |      |
| ssp-miR1432           | KY548506.1                | 7.0 | -1.0 | 1 | 21 | 3980                   | 4000 |
| CUCAGGAAAGAUGACACCGAC | :: : ::::: : : :::::      |     |      |   |    | UACGAUUUCAUCAUAUUUGAC  |      |
| Cleavage              | Sugarcane mosaic virus 1  |     |      |   |    |                        |      |
| ssp-miR437b           | KY548506.1                | 7.0 | -1.0 | 1 | 21 | 727                    | 747  |
| AAAGUUAGACAAGUUUGACAU | : : . : : ::::::::::      |     |      |   |    | AGGCUGUAGUGGUUUGACUUU  |      |
| Translation           | Sugarcane mosaic virus 1  |     |      |   |    |                        |      |
| ssp-miR437c           | KY548506.1                | 7.0 | -1.0 | 1 | 21 | 2981                   | 3001 |
| AAAGUUAGAGAAGUCUGACUU | ::::: : ::::: : ::        |     |      |   |    | GUACCAGACGUCUUUAGAUUA  |      |
| Cleavage              | Sugarcane mosaic virus 1  |     |      |   |    |                        |      |
| ssp-miR444a           | KY548506.1                | 7.0 | -1.0 | 1 | 21 | 1058                   | 1077 |
| UGCAGUUGUUGCCUCAAGCUU | ::::: : ::::: : ::        |     |      |   |    | GAGUUUGGGGCGA-AGCUAUA  |      |
| Cleavage              | Sugarcane mosaic virus 3  |     |      |   |    |                        |      |
| ssp-miR444a           | KY548506.1                | 7.0 | -1.0 | 1 | 21 | 2367                   | 2387 |
| UGCAGUUGUUGCCUCAAGCUU | ::::: : : ::::::::::      |     |      |   |    | UAGCUUUUAUAAUAAUUGUU   |      |
| Cleavage              | Sugarcane mosaic virus 3  |     |      |   |    |                        |      |
| ssp-miR444a           | KY548506.1                | 7.0 | -1.0 | 1 | 21 | 6641                   | 6661 |
| UGCAGUUGUUGCCUCAAGCUU | :::: : ::::: : :: : :     |     |      |   |    | UUCUUUGUGGCGAUGCCUGAA  |      |
| Cleavage              | Sugarcane mosaic virus 3  |     |      |   |    |                        |      |
| ssp-miR444b.1         | KY548506.1                | 7.0 | -1.0 | 1 | 21 | 1058                   | 1078 |
| UUGUGGCUUUCUUGCAAGUUG | ::::: . . ::::::::::      |     |      |   |    | GAGUUUGGGGCGAAGCUAUAC  |      |
| Translation           | Sugarcane mosaic virus 4  |     |      |   |    |                        |      |
| ssp-miR444b.1         | KY548506.1                | 7.0 | -1.0 | 1 | 21 | 715                    | 735  |
| UUGUGGCUUUCUUGCAAGUUG | ::::: : : ::::::::::      |     |      |   |    | AGGUUUCAAACAAGGCUGUAG  |      |
| Translation           | Sugarcane mosaic virus 4  |     |      |   |    |                        |      |
| ssp-miR444b.2         | KY548506.1                | 7.0 | -1.0 | 1 | 21 | 1058                   | 1077 |
| UGCAGUUGUUGCCUCAAGCUU | ::::: : ::::: : ::        |     |      |   |    | GAGUUUGGGGCGA-AGCUAUA  |      |
| Cleavage              | Sugarcane mosaic virus 3  |     |      |   |    |                        |      |
| ssp-miR444b.2         | KY548506.1                | 7.0 | -1.0 | 1 | 21 | 2367                   | 2387 |
| UGCAGUUGUUGCCUCAAGCUU | ::::: : : ::::::::::      |     |      |   |    | UAGCUUUUAUAAUAAUUGUU   |      |
| Cleavage              | Sugarcane mosaic virus 3  |     |      |   |    |                        |      |
| ssp-miR444b.2         | KY548506.1                | 7.0 | -1.0 | 1 | 21 | 6641                   | 6661 |
| UGCAGUUGUUGCCUCAAGCUU | :::: : ::::: : :: : :     |     |      |   |    | UUCUUUGUGGCGAUGCCUGAA  |      |
| Cleavage              | Sugarcane mosaic virus 3  |     |      |   |    |                        |      |
| ssp-miR444c-3p        | KY548506.1                | 7.0 | -1.0 | 1 | 21 | 1763                   | 1783 |
| UGCAGUUGUUGUCUCAAGCUU | ::::: : : :: ::           |     |      |   |    | UACUCUGAGAUAAUACCUCCA  |      |
| Cleavage              | Sugarcane mosaic virus 6  |     |      |   |    |                        |      |

|                |                                      |     |       |       |      |                       |                       |
|----------------|--------------------------------------|-----|-------|-------|------|-----------------------|-----------------------|
| ssp-miR444c-3p | KY548506.1                           | 7.0 | -1.0  | 1     | 21   | 7663                  | 7683                  |
|                | UGCAGUUGUUGUCUCAAGCUU                |     | ..... | ..... | ...  | GGAUUUGGGAGAACGAAUGUU |                       |
|                | Translation Sugarcane mosaic virus 6 |     |       |       |      |                       |                       |
| ssp-miR444c-3p | KY548506.1                           | 7.0 | -1.0  | 1     | 21   | 9282                  | 9302                  |
|                | UGCAGUUGUUGUCUCAAGCUU                |     | ....  | :     | .... | ...                   | CAGCUGGCGACGUUAGUCGCA |
|                | Cleavage Sugarcane mosaic virus 6    |     |       |       |      |                       |                       |

Individual hits

---

dataset: 1  
target: KY548506.1  
length: 9575  
miRNA : sof-miR156  
length: 20

mfe: -23.9 kcal/mol  
p-value: undefined

position 9402  
target 5' G UG GU C 3'  
GCUU UCUC UUCUG  
CGAG AGAG AAGAC  
miRNA 3' CA UG AGU 5'

---

dataset: 1  
target: KY548506.1  
length: 9575  
miRNA : sof-miR159a  
length: 21

mfe: -23.2 kcal/mol  
p-value: undefined

position 8953  
target 5' A AU AA U 3'  
AGAGU UCCUUUAA CCAG  
UCUCG AGGGAAGUU GGUU  
miRNA 3' G A U 5'

---

dataset: 1  
target: KY548506.1  
length: 9575  
miRNA : sof-miR159b  
length: 21

mfe: -23.2 kcal/mol  
p-value: undefined

position 8953  
target 5' A AU AA U 3'  
AGAGU UCCUUUAA CCAG  
UCUCG AGGGAAGUU GGUU  
miRNA 3' G A U 5'

---

dataset: 1  
target: KY548506.1  
length: 9575

miRNA : sof-miR159c  
length: 21

mfe: -25.4 kcal/mol  
p-value: undefined

position 1830  
target 5' U U AAGCACG CC U 3'  
GGA CUCCC UCA UCCAAG  
CCU GAGGG AGU AGGUUC  
miRNA 3' U C A U 5'

---

dataset: 1  
target: KY548506.1  
length: 9575  
miRNA : sof-miR159d  
length: 21

mfe: -23.2 kcal/mol  
p-value: undefined

position 8953  
target 5' A AU AA U 3'  
AGAGU UUCCUUUAA CCAG  
UCUCG AGGGAAGUU GGUU  
miRNA 3' G A U 5'

---

dataset: 1  
target: KY548506.1  
length: 9575  
miRNA : sof-miR159e  
length: 21

mfe: -21.6 kcal/mol  
p-value: undefined

position 8952  
target 5' A AUU AAAA U 3'  
AAGAGU UCCUUU CCAG  
UUCUCG AGGAAA GGUU  
miRNA 3' GUUA U 5'

---

dataset: 1  
target: KY548506.1  
length: 9575  
miRNA : sof-miR167a  
length: 21

mfe: -24.4 kcal/mol  
p-value: undefined



position 2699  
target 5' G AUUAAACCA AUG A U 3'  
UAGAUCA UGC GGCAG UUA  
GUCUAGU ACG CCGUC AAGU  
miRNA 3' A G 5'

---

dataset: 1  
target: KY548506.1  
length: 9575  
miRNA : sof-miR167b  
length: 21

mfe: -24.4 kcal/mol  
p-value: undefined

position 2699  
target 5' G AUUAAACCA AUG A U 3'  
UAGAUCA UGC GGCAG UUA  
GUCUAGU ACG CCGUC AAGU  
miRNA 3' A G 5'

---

dataset: 1  
target: KY548506.1  
length: 9575  
miRNA : sof-miR168a  
length: 21

mfe: -25.8 kcal/mol  
p-value: undefined

position 1296  
target 5' C GGAC AUGA G 3'  
UCCUGA GCA AAGCGA  
AGGGCU CGU UUCGCU  
miRNA 3' C AGA GG 5'

---

dataset: 1  
target: KY548506.1  
length: 9575  
miRNA : sof-miR168b  
length: 20

mfe: -27.0 kcal/mol  
p-value: undefined

position 1818  
target 5' A AAAAAUAGUG A 3'  
CCC GAUCU CCCAAGC  
GGG CUAGA GGGUUCG  
miRNA 3' CA C CU 5'

---

dataset: 1  
target: KY548506.1  
length: 9575  
miRNA : sof-miR396  
length: 21

mfe: -27.6 kcal/mol  
p-value: undefined

position 5016  
target 5' A U UAC G 3'  
UAGUUCAAG AGCUGU GGGA  
GUCAAGUUC UCGACA CCUU  
miRNA 3' UU 5'

---

dataset: 1  
target: KY548506.1  
length: 9575  
miRNA : sof-miR408a  
length: 21

mfe: -27.3 kcal/mol  
p-value: undefined

position 8355  
target 5' U UACUU AUUACAAUGA AUGUUGUCCAUCAG G 3'  
GCCAGGG GGAGG AG GCAG  
CGGUCCC UCUC C UC CGUC  
miRNA 3' U G A 5'

---

dataset: 1  
target: KY548506.1  
length: 9575  
miRNA : sof-miR408b  
length: 21

mfe: -27.3 kcal/mol  
p-value: undefined

position 8355  
target 5' U UACUU AUUACAAUGA AUGUUGUCCAUCAG G 3'  
GCCAGGG GGAGG AG GCAG  
CGGUCCC UCUC C UC CGUC  
miRNA 3' U G A 5'

---

dataset: 1  
target: KY548506.1  
length: 9575  
miRNA : sof-miR408c

length: 21

mfe: -27.3 kcal/mol

p-value: undefined

position 8355

```
target 5' U      UACUU      AUUACAAUGA  AUGUUGUCCAUCAG  G 3'
          GCCAGGG      GGAGG      AG      GCAG
          CGGUCCC      UCUC      UC      CGUC
miRNA  3'      U      G      A      5'
```

---

dataset: 1

target: KY548506.1

length: 9575

miRNA : sof-miR408d

length: 21

mfe: -27.3 kcal/mol

p-value: undefined

position 8355

```
target 5' U      UACUU      AUUACAAUGA  AUGUUGUCCAUCAG  G 3'
          GCCAGGG      GGAGG      AG      GCAG
          CGGUCCC      UCUC      UC      CGUC
miRNA  3'      U      G      A      5'
```

---

dataset: 1

target: KY548506.1

length: 9575

miRNA : sof-miR408e

length: 21

mfe: -24.8 kcal/mol

p-value: undefined

position 3633

```
target 5' G  U      A      U      G A 3'
          GC CGGGGGA AGUU GUG A
          CG GUCCCUU UCAG CAC U
miRNA  3'      C      U      G C 5'
```

---

dataset: 1

target: KY548506.1

length: 9575

miRNA : ssp-miR166

length: 21

mfe: -24.9 kcal/mol

p-value: undefined

position 3714

```
target 5' A      UUUUACUCCGA      GU      A 3'
          GGAGU      GGAGCC  UGGUUC
          CCUUA      CUUCGG  ACCAGG
miRNA  3' CC                                  CU 5'
```

---

```
dataset: 1
target: KY548506.1
length: 9575
miRNA : ssp-miR169
length: 21
```

```
mfe: -28.0 kcal/mol
p-value: undefined
```

```
position 8458
target 5' U      AA      AC      A 3'
          CCGGCAAGU  CGUU      GGC
          GGCCGUUCA  GUAG      CCG
miRNA  3'                                  GAA  AU 5'
```

---

```
dataset: 1
target: KY548506.1
length: 9575
miRNA : ssp-miR437a
length: 21
```

```
mfe: -21.2 kcal/mol
p-value: undefined
```

```
position 4868
target 5' A      AA      G 3'
          AAGUC AACUUC  UAACU
          UUCAG UUGAAG  AUUGA
miRNA  3'      U      AG      AA 5'
```

---

```
dataset: 1
target: KY548506.1
length: 9575
miRNA : ssp-miR437b
length: 21
```

```
mfe: -20.2 kcal/mol
p-value: undefined
```

```
position 2416
target 5' A      AAUCAAG      G 3'
          GUUAAA      GUCUAGCU
          CAGUUU      CAGAUUGA
miRNA  3' UA      GAA      AA 5'
```

---

dataset: 1  
target: KY548506.1  
length: 9575  
miRNA : ssp-miR437c  
length: 21

mfe: -21.9 kcal/mol  
p-value: undefined

position 9395  
target 5' A G UUG GUUUCU U 3'  
AAGU AGGCU UCUC GCUUU  
UUCA UCUGA AGAG UGAAA  
miRNA 3' G AU 5'

---

dataset: 1  
target: KY548506.1  
length: 9575  
miRNA : ssp-miR528  
length: 21

mfe: -26.5 kcal/mol  
p-value: undefined

position 121  
target 5' C CG U GA G 3'  
CUCCUU GCAU C CUUCCG  
GAGGAG CGUA G GAAGGU  
miRNA 3' A C GG 5'

---

dataset: 1  
target: KY548506.1  
length: 9575  
miRNA : ssp-miR827  
length: 21

mfe: -23.2 kcal/mol  
p-value: undefined

position 6338  
target 5' A C AGAGAU A 3'  
UUGCU GA UGGUCAUC  
AACGA CU ACCAGUAG  
miRNA 3' ACA AUU 5'

---

dataset: 1  
target: KY548506.1  
length: 9575  
miRNA : ssp-miR444a  
length: 21

```

position 1057
target 5' C          AAGCUAU          GAAU          A 3'
          GAGUUUGGGGGCG          ACAA          CUGCA
          UUCGAACUCCGU          UGUU          GACGU
miRNA 3'

```

```

position 1057
target 5' C          AAGCUAU          GAAU          A 3'
          GAGUUUUGGGGCG          ACAA          CUGCA
          UUCGAACUCCGU          UGUU          GACGU
miRNA 3'

```

```

position 1057
target 5' C          AAGCUAU      GAAU      A 3'
          GAGUUUGGGGCG      ACAA      CUGCA
          UUCGAACUCUGU      UGUU      GACGU

miRNA 3'                                     5'

```

```

position  4533
target 5' G          UU          G  3'

```

```

      UUUGGGAC GAG  GGUAG
      AAACCCUG CUC  UCAUC
miRNA  3'          C   CC      AU 5'
```

---

```
dataset: 1
target: KY548506.1
length: 9575
miRNA : ssp-miR1432
length: 21
```

```
mfe: -22.2 kcal/mol
p-value: undefined
```

```
position 1316
target 5'  G  A              G  A 3'
          CG GUGUC UCUUU UUGG
          GC CACAG AGAAA GACU
miRNA  3' CA              U    G    C 5'
```

---
